CORRECTION

# Correction: Insights into the Interactions of *Fasciola hepatica* Cathepsin L3 with a Substrate and Potential Novel Inhibitors through *In Silico* Approaches

The PLOS Neglected Tropical Diseases Staff

There is an error in the citation. The name of the fourth author, Rosemberg de Oliveira Soares, appears incorrectly. Please see the corrected citation here: Hernández Alvarez L, Naranjo Feliciano D, Hernández González JE, Soares RO, Barreto Gomes DE, Pascutti PG (2015) Insights into the Interactions of *Fasciola hepatica* Cathepsin L3 with a Substrate and Potential Novel Inhibitors through *In Silico* Approaches. PLoS Negl Trop Dis 9(5): e0003759. doi:[10.1371/journal.pntd.0003759](https://doi.org/10.1371/journal.pntd.0003759)

## Reference

1. Hernández Alvarez L, Naranjo Feliciano D, Hernández González JE, de Oliveira Soares R, Barreto Gomes DE, Pascutti PG (2015) Insights into the Interactions of *Fasciola hepatica* Cathepsin L3 with a Substrate and Potential Novel Inhibitors through *In Silico* Approaches. PLoS Negl Trop Dis 9(5): e0003759. doi:[10.1371/journal.pntd.0003759](https://doi.org/10.1371/journal.pntd.0003759) PMID: [25978322](https://pubmed.ncbi.nlm.nih.gov/25978322/)

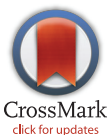

## OPEN ACCESS

**Citation:** The PLOS Neglected Tropical Diseases Staff (2015) Correction: Insights into the Interactions of *Fasciola hepatica* Cathepsin L3 with a Substrate and Potential Novel Inhibitors through *In Silico* Approaches. PLoS Negl Trop Dis 9(6): e0003856. doi:[10.1371/journal.pntd.0003856](https://doi.org/10.1371/journal.pntd.0003856)

**Published:** June 15, 2015

**Copyright:** © 2015 The PLOS Neglected Tropical Diseases Staff. This is an open access article distributed under the terms of the [Creative Commons Attribution License](https://creativecommons.org/licenses/by/4.0/), which permits unrestricted use, distribution, and reproduction in any medium, provided the original author and source are credited.
